# Supplementary material
Source: PubMed Central journal article supplement (PMC7676348)
Supplement: NIHMS1596401-supplement-1.pdf [file NIHMS1596401-supplement-1.pdf]

**Online Repository**

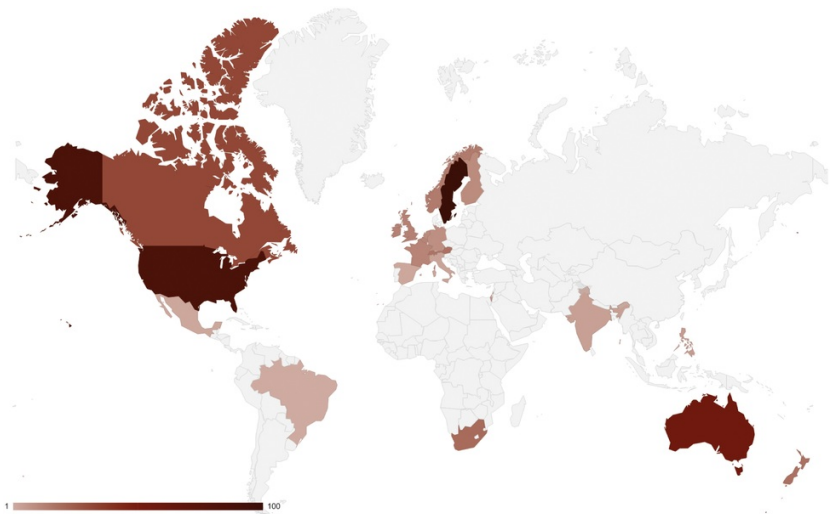

**Figure E1** Global heat map of relative search volume (RSV) for "Alpha-gal allergy" (topic), 2004-2019. Highest RSV was in the following countries: Sweden, United States, Canada, Australia, and South Africa.
